# Supplementary material for: Is Participatory Design Associated with the Effectiveness of Serious Digital Games for Healthy Lifestyle Promotion? A Meta-Analysis
Source: PubMed Central journal article supplement (PMC4867751; doi:10.2196/jmir.4444), 2016-04-29
Supplement: jmir_v18i4e94_app3.pdf [file jmir_v18i4e94_app3.pdf]

**Table A3-1. User involvement as moderator in game effectiveness (games published <2010).**

| <b>Outcome</b>                               | <b>n</b> | <b>k</b> | <b>Hedges' g (95% CI)</b> | <b><i>P<sub>g</sub></i></b> | <b>Q</b> | <b><i>P<sub>Q</sub></i></b> | <b><i>I</i><sup>2</sup> Index</b> |
|----------------------------------------------|----------|----------|---------------------------|-----------------------------|----------|-----------------------------|-----------------------------------|
| <b>BEHAVIOR</b>                              |          |          |                           |                             |          |                             |                                   |
| <b>TOTAL<sup>1</sup></b>                     | 6121     | 9        | 0.102 [-0.005; 0.199]     | .04                         | 310.05   | <.001                       | 97%                               |
| <b>User involvement (between categories)</b> | 5989     | 8        |                           |                             | 1.15     | .28                         |                                   |
| <b>Within categories</b>                     |          |          |                           |                             |          |                             |                                   |
| No involvement                               | 3036     | 2        | 0.728 [-0.460; 1.915]     | .23                         | 230.53   | <.001                       | 99%                               |
| Involvement only as tester                   | 132      | 1        | 0.349 [0.007; 0.692]      | .046                        | NA       |                             |                                   |
| Involvement as informant or co-designer      | 2953     | 6        | 0.076 [-0.026; 0.177]     | .15                         | 8.87     | .16                         | 36%                               |
| <b>BEHAVIORAL DETERMINANTS</b>               |          |          |                           |                             |          |                             |                                   |
| <b>TOTAL<sup>1</sup></b>                     | 6797     | 21       | 0.289 [0.197; 0.381]      | <.001                       | 52.17    | <.001                       | 62%                               |
| <b>User involvement (between categories)</b> | 6797     | 21       |                           |                             | 1.41     | .49                         |                                   |
| <b>Within categories</b>                     |          |          |                           |                             |          |                             |                                   |
| No involvement                               | 3718     | 7        | 0.278 [0.083; 0.473]      | .01                         | 29.96    | <.001                       | 80%                               |
| Involvement only as tester                   | 558      | 5        | 0.443 [0.171; 0.715]      | .001                        | 9.05     | .06                         | 56%                               |
| Involvement as informant or co-designer      | 2521     | 9        | 0.266 [0.153; 0.379]      | <.001                       | 11.21    | .19                         | 29%                               |
| <b>SELF-EFFICACY</b>                         |          |          |                           |                             |          |                             |                                   |
| <b>TOTAL<sup>1</sup></b>                     | 2932     | 10       | 0.322 [0.236; 0.407]      | <.001                       | 18.28    | .03                         | 51%                               |
| <b>User involvement (between categories)</b> | 2793     | 9        |                           |                             | 2.63     | .11                         |                                   |
| <b>Within categories</b>                     |          |          |                           |                             |          |                             |                                   |
| No involvement                               | 1324     | 4        | 0.401 [0.292; 0.509]      | <.001                       | 1.46     | .69                         | 0%                                |
| Involvement only as tester                   | 139      | 1        | -0.052 [-0.382; 0.279]    | .76                         | NA       |                             |                                   |
| Involvement as informant or co-designer      | 1419     | 5        | 0.245 [0.093; 0.398]      | .002                        | 7.97     | .09                         | 50%                               |
| <b>CLINICAL OUTCOMES</b>                     |          |          |                           |                             |          |                             |                                   |
| <b>TOTAL<sup>1</sup></b>                     | 894      | 6        | -0.060 [-0.163; 0.168]    | .97                         | 5.17     | .40                         | 3%                                |
| <b>User involvement (between categories)</b> | 835      | 5        |                           |                             | 6.34     | .43                         |                                   |
| <b>Within categories</b>                     |          |          |                           |                             |          |                             |                                   |
| No involvement                               | 59       | 1        | -0.115 [-0.620; 0.389]    | .65                         | NA       |                             |                                   |
| Involvement only as tester                   | 269      | 2        | 0.083 [-0.156; 0.322]     | .50                         | 0.05     | .82                         | 0%                                |

---

|                                            |     |   |                        |     |      |     |     |
|--------------------------------------------|-----|---|------------------------|-----|------|-----|-----|
| Involvement as informant<br>or co-designer | 566 | 3 | -0.060 [-0.317; 0.198] | .65 | 4.34 | .11 | 54% |
|--------------------------------------------|-----|---|------------------------|-----|------|-----|-----|

---

**Table A3-2. User involvement as moderator in game effectiveness (games published 2010-2014).**

| <b>Outcome</b>                               | <b>n</b> | <b>k</b> | <b>Hedges' g (95% CI)</b> | <b><i>P<sub>g</sub></i></b> | <b>Q</b> | <b><i>P<sub>Q</sub></i></b> | <b><i>I</i><sup>2</sup> Index</b> |
|----------------------------------------------|----------|----------|---------------------------|-----------------------------|----------|-----------------------------|-----------------------------------|
| <b>BEHAVIOR</b>                              |          |          |                           |                             |          |                             |                                   |
| <b>TOTAL<sup>1</sup></b>                     | 5563     | 13       | 0.092 [0.019; 0.164]      | .01                         | 37.85    | <.001                       | 68%                               |
| <b>User involvement (between categories)</b> | 5361     | 11       |                           |                             | 3.87     | .049                        |                                   |
| <b>Within categories</b>                     |          |          |                           |                             |          |                             |                                   |
| No involvement                               | 202      | 2        | 0.292 [0.012; 0.572]      | .04                         | 1.03     | .31                         | 3%                                |
| Involvement only as tester                   | 298      | 3        | 0.577 [0.074; 1.081]      | .03                         | 8.31     | .02                         | 76%                               |
| Involvement as informant or co-designer      | 5063     | 8        | 0.066 [-0.010; 0.142]     | .09                         | 6.68     | .46                         | 0%                                |
| <b>BEHAVIORAL DETERMINANTS</b>               |          |          |                           |                             |          |                             |                                   |
| <b>TOTAL<sup>1</sup></b>                     | 6203     | 23       | 0.332 [0.247; 0.416]      | <.001                       | 55.75    | <.001                       | 61%                               |
| <b>User involvement (between categories)</b> | 6203     | 23       |                           |                             | 1.95     | .38                         |                                   |
| <b>Within categories</b>                     |          |          |                           |                             |          |                             |                                   |
| No involvement                               | 931      | 9        | 0.322 [0.173; 0.472]      | <.001                       | 8.99     | .34                         | 11%                               |
| Involvement only as tester                   | 777      | 3        | 0.410 [0.264; 0.556]      | <.001                       | 0.91     | .64                         | 0%                                |
| Involvement as informant or co-designer      | 4495     | 11       | 0.264 [0.120; 0.409]      | <.001                       | 37.01    | <.001                       | 73%                               |
| <b>SELF-EFFICACY</b>                         |          |          |                           |                             |          |                             |                                   |
| <b>TOTAL<sup>1</sup></b>                     | 3466     | 10       | 0.131 [0.064; 0.199]      | <.001                       | 21.14    | .01                         | 57%                               |
| <b>User involvement (between categories)</b> | 3466     | 10       |                           |                             | 8.17     | .02                         |                                   |
| <b>Within categories</b>                     |          |          |                           |                             |          |                             |                                   |
| No involvement                               | 221      | 4        | 0.281 [0.009; 0.553]      | .04                         | 0.63     | .89                         | 0%                                |
| Involvement only as tester                   | 295      | 2        | 0.483 [0.253; 0.714]      | <.001                       | 0.04     | .85                         | 0%                                |
| Involvement as informant or co-designer      | 2950     | 4        | 0.098 [-0.041; 0.237]     | .17                         | 8.83     | .03                         | 66%                               |
| <b>CLINICAL OUTCOMES</b>                     |          |          |                           |                             |          |                             |                                   |
| <b>TOTAL<sup>1</sup></b>                     | 309      | 3        | 0.060 [-0.175; 0.501]     | .62                         | 1.20     | .55                         | 0%                                |
| <b>User involvement (between categories)</b> | 309      | 3        |                           |                             | NA       |                             |                                   |
| <b>Within categories</b>                     |          |          |                           |                             |          |                             |                                   |

|                                            |     |   |                        |     |    |  |  |
|--------------------------------------------|-----|---|------------------------|-----|----|--|--|
| No involvement                             | 60  | 1 | 0.052 [-0.479; 0.582]  | .85 | NA |  |  |
| Involvement only as tester                 | 115 | 1 | -0.090 [-0.467; 0.288] | .64 | NA |  |  |
| Involvement as informant<br>or co-designer | 134 | 1 | 0.204 [-0.161; 0.568]  | .27 | NA |  |  |

**Table A3-3. User involvement as moderator in game effectiveness (average age of participants <18 years).**

| Outcome                                      | <i>n</i> | <i>k</i> | Hedges' <i>g</i> (95% CI) | <i>P<sub>g</sub></i> | <i>Q</i> | <i>P<sub>Q</sub></i> | <i>I<sup>2</sup></i> Index |
|----------------------------------------------|----------|----------|---------------------------|----------------------|----------|----------------------|----------------------------|
| <b>BEHAVIOR</b>                              |          |          |                           |                      |          |                      |                            |
| <b>TOTAL<sup>1</sup></b>                     | 10200    | 16       | 0.108 [0.050; 0.166]      | <.001                | 320.30   | <.001                | 95%                        |
| <b>User involvement (between categories)</b> | 10068    | 15       |                           |                      | 1.26     | .26                  |                            |
| <b>Within categories</b>                     |          |          |                           |                      |          |                      |                            |
| No involvement                               | 3238     | 4        | 0.540 [-0.230; 1.311]     | .17                  | 234.29   | <.001                | 99%                        |
| Involvement only as tester                   | 132      | 1        | 0.349 [0.007; 0.692]      | .046                 | NA       |                      |                            |
| Involvement as informant or co-designer      | 6830     | 11       | 0.098 [0.040; 0.157]      | <.001                | 7.88     | .64                  | 0%                         |
| <b>BEHAVIORAL DETERMINANTS</b>               |          |          |                           |                      |          |                      |                            |
| <b>TOTAL<sup>1</sup></b>                     | 9555     | 25       | 0.312 [0.220; 0.403]      | <.001                | 73.01    | <.001                | 67%                        |
| <b>User involvement (between categories)</b> | 9555     | 25       |                           |                      | 0.23     | .89                  |                            |
| <b>Within categories</b>                     |          |          |                           |                      |          |                      |                            |
| No involvement                               | 4210     | 10       | 0.313 [0.183; 0.442]      | <.001                | 22.44    | .01                  | 60%                        |
| Involvement only as tester                   | 322      | 3        | 0.425 [-0.057; 0.906]     | .08                  | 7.37     | .03                  | 73%                        |
| Involvement as informant or co-designer      | 5023     | 12       | 0.302 [0.168; 0.437]      | <.001                | 37.07    | <.001                | 70%                        |
| <b>SELF-EFFICACY</b>                         |          |          |                           |                      |          |                      |                            |
| <b>TOTAL<sup>1</sup></b>                     | 5388     | 12       | 0.240 [0.164; 0.317]      | <.001                | 35.91    | <.001                | 69%                        |
| <b>User involvement (between categories)</b> | 5199     | 11       |                           |                      | 9.66     | .002                 |                            |
| <b>Within categories</b>                     |          |          |                           |                      |          |                      |                            |
| No involvement                               | 1321     | 4        | 0.377 [0.268; 0.486]      | <.001                | 1.10     | .78                  | 0%                         |
| Involvement only as tester                   | 139      | 1        | -0.052 [-0.382; 0.279]    | .76                  | NA       |                      |                            |
| Involvement as informant or co-designer      | 3878     | 7        | 0.127 [0.014; 0.241]      | .03                  | 15.54    | .02                  | 61%                        |
| <b>CLINICAL OUTCOMES</b>                     |          |          |                           |                      |          |                      |                            |
| <b>TOTAL<sup>1</sup></b>                     | 818      | 5        | 0.013 [-0.172; 0.199]     | .89                  | 5.67     | .23                  | 29%                        |
| <b>User involvement (between categories)</b> | 835      | 5        |                           |                      | NA       |                      |                            |

| <b>Within categories</b>                   |     |   |                        |     |      |     |     |
|--------------------------------------------|-----|---|------------------------|-----|------|-----|-----|
| No involvement                             | 0   | 0 | NA                     |     | NA   |     |     |
| Involvement only as tester                 | 118 | 1 | 0.052 [-0.308; 0.411]  | .78 | NA   |     |     |
| Involvement as informant<br>or co-designer | 700 | 4 | -0.001 [-0.217; 0.216] | .99 | 5.63 | .13 | 47% |

---

**Table A3-4. User involvement as moderator in game effectiveness (average age of participants ≥ 18 years)**

| Outcome                                      | <i>n</i> | <i>k</i> | Hedges' <i>g</i> (95% CI) | <i>P<sub>g</sub></i> | <i>Q</i> | <i>P<sub>Q</sub></i> | <i>I<sup>2</sup></i> Index |
|----------------------------------------------|----------|----------|---------------------------|----------------------|----------|----------------------|----------------------------|
| <b>BEHAVIOR</b>                              |          |          |                           |                      |          |                      |                            |
| <b>TOTAL<sup>1</sup></b>                     | 1484     | 6        | 0.067 [-0.094; 0.229]     | 0.41                 | 35.78    | <.001                | 86%                        |
| <b>User involvement (between categories)</b> | 1484     | 6        |                           |                      | 4.39     | .04                  |                            |
| <b>Within categories</b>                     |          |          |                           |                      |          |                      |                            |
| No involvement                               | 0        | 0        | NA                        |                      | NA       |                      |                            |
| Involvement only as tester                   | 298      | 3        | 0.577 [0.074; 1.081]      | .03                  | 8.31     | .02                  | 76%                        |
| Involvement as informant or co-designer      | 1186     | 3        | 0.009 [-0.161; 0.179]     | 0.92                 | 4.09     | .13                  | 51%                        |
| <b>BEHAVIORAL DETERMINANTS</b>               |          |          |                           |                      |          |                      |                            |
| <b>TOTAL<sup>1</sup></b>                     | 3248     | 16       | 0.328 [0.231; 0.424]      | <.001                | 32.86    | .01                  | 54%                        |
| <b>User involvement (between categories)</b> | 3248     | 16       |                           |                      | 3.15     | .21                  |                            |
| <b>Within categories</b>                     |          |          |                           |                      |          |                      |                            |
| No involvement                               | 380      | 5        | 0.279 [-0.154; 0.712]     | .21                  | 15.17    | .004                 | 74%                        |
| Involvement only as tester                   | 935      | 4        | 0.410 [0.277; 0.542]      | <.001                | 0.91     | .82                  | 0%                         |
| Involvement as informant or co-designer      | 1933     | 7        | 0.231 [0.082; 0.379]      | .002                 | 11.55    | .07                  | 48%                        |
| <b>SELF-EFFICACY</b>                         |          |          |                           |                      |          |                      |                            |
| <b>TOTAL<sup>1</sup></b>                     | 1001     | 7        | 0.407 [0.281; 0.532]      | <.001                | 2.50     | .87                  | 0%                         |
| <b>User involvement (between categories)</b> | 1001     | 7        |                           |                      | 0.92     | .63                  |                            |
| <b>Within categories</b>                     |          |          |                           |                      |          |                      |                            |
| No involvement                               | 165      | 3        | 0.453 [0.140; 0.765]      | .004                 | 1.41     | .49                  | 0%                         |
| Involvement only as tester                   | 295      | 2        | 0.483 [0.253; 0.714]      | <.001                | 0.04     | .85                  | 0%                         |
| Involvement as informant or co-designer      | 541      | 2        | 0.351 [0.181; 0.521]      | <.001                | 0.14     | .71                  | 0%                         |
| <b>CLINICAL OUTCOMES</b>                     |          |          |                           |                      |          |                      |                            |
| <b>TOTAL<sup>1</sup></b>                     | 175      | 2        | -0.042 [-0.350; 0.265]    | .79                  | 0.18     | .67                  | 0%                         |
| <b>User involvement (between categories)</b> | 175      | 2        |                           |                      | NA       |                      |                            |
| <b>Within categories</b>                     |          |          |                           |                      |          |                      |                            |

|                                            |     |   |                        |     |    |  |  |
|--------------------------------------------|-----|---|------------------------|-----|----|--|--|
| No involvement                             | 60  | 1 | 0.052 [-0.479; 0.582]  | .85 | NA |  |  |
| Involvement only as tester                 | 118 | 1 | -0.090 [-0.467; 0.288] | .64 | NA |  |  |
| Involvement as informant<br>or co-designer | 0   | 0 | NA                     |     | NA |  |  |



**Table A3-5.** Meta-regression results of user involvement as informant or co-designer on game study effectiveness in behavior and behavioral determinants

|                                | K  | N    | INFORMANT |               |             | CO-DESIGNER |               |     |
|--------------------------------|----|------|-----------|---------------|-------------|-------------|---------------|-----|
|                                |    |      | $\beta$   | 95% CI        | P           | $\beta$     | 95% CI        | P   |
| <b>BEHAVIOR</b>                |    |      |           |               |             |             |               |     |
| All areas                      | 14 | 8016 | -0.002    | -0.032; 0.029 | .92         | -0.007      | -0.041; 0.027 | .69 |
| Aesthetics                     | 14 | 8016 | -0.001    | -0.038; 0.035 | .94         | -0.024      | -0.065; 0.017 | .27 |
| Dynamics                       | 14 | 8016 | 0.074     | -0.040; 0.187 | .20         |             | NA            |     |
| Mechanics                      | 14 | 8016 | -0.064    | -0.161; 0.033 | .20         | 0.063       | -0.064; 0.190 | .33 |
| <b>BEHAVIORAL DETERMINANTS</b> |    |      |           |               |             |             |               |     |
| All areas                      | 16 | 6155 | 0.034     | -0.039; 0.108 | .36         | 0.036       | -0.015; 0.089 | .16 |
| Aesthetics                     | 16 | 6155 | 0.025     | -0.058; 0.108 | .56         | 0.046       | -0.027; 0.120 | .22 |
| Dynamics                       | 16 | 6155 | 0.235     | 0.079; 0.329  | <b>.003</b> | 0.157       | -0.115; 0.428 | .26 |
| Mechanics                      | 16 | 6155 | -0.078    | -0.343; 0.188 | .57         |             | NA            |     |

*n*=combined participant sample size; *k*=number of studies;  $\beta$  : meta-regression weight; CI= confidence Interval; NA: not available, due to insufficient observations or variation

**Table A3-6.** Moderator analysis for the role of PD in educational content on the game study effectiveness outcomes on behavior and behavioral determinants.

| Outcome                                         | <i>n</i> | <i>k</i> | Hedges' <i>g</i> (95% CI) | <i>P</i> | <i>Q</i> | <i>P</i> | <i>I</i> <sup>2</sup> Index |
|-------------------------------------------------|----------|----------|---------------------------|----------|----------|----------|-----------------------------|
| <b>BEHAVIOR</b>                                 |          |          |                           |          |          |          |                             |
| Involvement as informant (between categories)   | 8016     | 14       |                           |          | 0.06     | .81      |                             |
| <b>Within categories</b>                        |          |          |                           |          |          |          |                             |
| No                                              | 1164     | 4        | 0.104 [-0.072; 0.280]     | .25      | 5.95     | .11      | 50%                         |
| Yes                                             | 6352     | 10       | 0.081 [0.022; 0.140]      | .007     | 8.60     | .48      | 0%                          |
| Involvement as co-designer (between categories) | 8016     | 14       |                           |          | 1.04     | .31      |                             |
| <b>Within categories</b>                        |          |          |                           |          |          |          |                             |
| No                                              | 7341     | 13       | 0.068 [0.008; 0.128]      | .03      | 13.64    | .32      | 12%                         |
| Yes                                             | 675      | 1        | 0.194 [-0.041; 0.429]     | .11      | NA       |          |                             |
| <b>BEHAVIORAL DETERMINANTS</b>                  |          |          |                           |          |          |          |                             |
| Involvement as informant (between categories)   | 6155     | 16       |                           |          | 2.92     | .09      |                             |
| <b>Within categories</b>                        |          |          |                           |          |          |          |                             |
| No                                              | 1948     | 7        | 0.410 [0.160; 0.660]      | .001     | 23.76    | .001     | 75%                         |
| Yes                                             | 4207     | 9        | 0.182 [0.106; 0.258]      | <.001    | 10.36    | .24      | 23%                         |
| <b>Within categories</b>                        |          |          |                           |          |          |          |                             |
| No                                              | 6093     | 14       | 0.241 [0.143; 0.340]      | <.001    | 35.75    | .001     | 64%                         |
| Yes                                             | 62       | 2        | 0.561 [-0.072; 1.194]     | .08      | 1.61     | .21      | 38%                         |

*n*=combined participants sample size; *k*=number of studies; Hedges' *g* (random effects); CI= confidence Interval; *Q*= homogeneity statistic (mixed effects); *I*<sup>2</sup>=Inconsistency, a second measure of heterogeneity; NA: not available

**Table A3-7.** Moderator analysis for the role of user involvement in creating **narratives** on the game effectiveness outcomes on behavior and behavioral determinants.

| Outcome                                        | <i>n</i> | <i>k</i> | Hedges' <i>g</i> (95% CI) | <i>P</i> | <i>Q</i> | <i>P</i> | <i>I</i> <sup>2</sup> Index |
|------------------------------------------------|----------|----------|---------------------------|----------|----------|----------|-----------------------------|
| <b>BEHAVIOR</b>                                |          |          |                           |          |          |          |                             |
| Involvement as either informant or co-designer | 4113     | 8        |                           |          | 0.05     | .82      |                             |
| <b>No</b>                                      | 2357     | 4        | 0.049 [-0.070; 0.169]     | .42      | 4.91     | .18      | 39%                         |
| <b>Yes</b>                                     | 1757     | 4        | 0.072 [-0.083; 0.226]     | .36      | 5.30     | .15      | 43%                         |
| Involvement as informant                       | 4113     | 8        |                           |          | 0.05     | .82      |                             |
| <b>No</b>                                      | 2357     | 4        | 0.049 [-0.070; 0.169]     | .42      | 4.91     | .18      | 39%                         |
| <b>Yes</b>                                     | 1757     | 4        | 0.072 [-0.083; 0.226]     | .36      | 5.30     | .15      | 43%                         |
| Involvement as co-designer                     | 4113     | 8        |                           |          | 0.03     | .87      |                             |
| <b>No</b>                                      | 2815     | 6        | 0.068 [-0.024; 0.159]     | .15      | 6.14     | .29      | 19%                         |
| <b>Yes</b>                                     | 1299     | 2        | 0.045 [-0.217; 0.307]     | .74      | 3.49     | .06      | 71%                         |
| <b>BEHAVIORAL DETERMINANTS</b>                 |          |          |                           |          |          |          |                             |
| Involvement as either informant or co-designer | 2808     | 10       |                           |          | 0.43     | .51      |                             |
| <b>No</b>                                      | 1233     | 5        | 0.352 [0.071; 0.633]      | .01      | 21.99    | <.001    | 82%                         |
| <b>Yes</b>                                     | 1575     | 5        | 0.244 [0.083; 0.405]      | .003     | 5.67     | .23      | 29%                         |
| Involvement as informant                       | 2808     | 10       |                           |          | 1.35     | .24      |                             |
| <b>No</b>                                      | 1382     | 8        | 0.385 [0.141; 0.630]      | .002     | 24.45    | .001     | 71%                         |
| <b>Yes</b>                                     | 1426     | 2        | 0.209 [0.039; 0.378]      | .02      | 2.42     | .12      | 59%                         |
| Involvement as co-designer                     | 2808     | 10       |                           |          | 0.00     | .99      |                             |
| <b>No</b>                                      | 1738     | 6        | 0.304 [0.076; 0.532]      | .009     | 25.75    | <.001    | 80%                         |
| <b>Yes</b>                                     | 1070     | 4        | 0.303 [0.177; 0.428]      | <.00     | 2.66     | .45      | 0%                          |

1

*n*=combined sample size; *k*=number of studies; Hedges' *g* (random effects); CI= confidence Interval; *Q*= homogeneity statistic (mixed effects); *I*<sup>2</sup>=Inconsistency, a second measure of heterogeneity; NA: not applicable

**Table A3-8.** Moderator analysis for the role of user involvement in design of the **challenge** on the game effectiveness outcomes on behavior and behavioral determinants.

| Outcome                                        | <i>n</i> | <i>k</i> | Hedges' <i>g</i> (95% CI) | <i>P</i>  | <i>Q</i> | <i>P</i> | <i>I</i> <sup>2</sup> Index |
|------------------------------------------------|----------|----------|---------------------------|-----------|----------|----------|-----------------------------|
| <b>BEHAVIOR</b>                                |          |          |                           |           |          |          |                             |
| Involvement as either informant or co-designer | 8016     | 14       |                           |           | 1.07     | .30      |                             |
| <b>No</b>                                      | 5394     | 10       | 0.052 [-0.027; 0.132]     | .20       | 11.89    | .22      | 24%                         |
| <b>Yes</b>                                     | 2622     | 4        | 0.113 [0.029; 0.198]      | .008      | 1.54     | .67      | 0%                          |
| Involvement as informant                       | 8016     | 14       |                           |           | 1.07     | .30      |                             |
| <b>No</b>                                      | 5394     | 10       | 0.052 [-0.027; 0.132]     | .20       | 11.89    | .22      | 24%                         |
| <b>Yes</b>                                     | 2622     | 4        | 0.113 [0.029; 0.198]      | .008      | 1.54     | .67      | 0%                          |
| Involvement as co-designer                     | 8016     | 14       |                           |           | 1.04     | .31      |                             |
| <b>No</b>                                      | 7341     | 13       | 0.068 [0.008; 0.128]      | <.05      | 13.64    | .32      | 12%                         |
| <b>Yes</b>                                     | 675      | 1        | 0.194 [-0.041; 0.429]     | .11       | NA       |          |                             |
| <b>BEHAVIORAL DETERMINANTS</b>                 |          |          |                           |           |          |          |                             |
| Involvement as either informant or co-designer | 6155     | 16       |                           |           | 2.93     | .09      |                             |
| <b>No</b>                                      | 5777     | 11       | 0.194 [0.126; 0.262]      | <.00<br>1 | 14.28    | .16      | 30%                         |
| <b>Yes</b>                                     | 377      | 5        | 0.579 [0.144; 1.013]      | .009      | 9.49     | .05      | 59%                         |
| Involvement as informant                       | 6155     | 16       |                           |           | NA       |          |                             |
| <b>No</b>                                      | 5926     | 14       | 0.202 [0.133; 0.271]      | <.00<br>1 | 18.00    | .16      | 28%                         |
| <b>Yes</b>                                     | 229      | 2        | 0.575 [-0.246; 1.396]     | .17       | 7.50     | .006     | 87%                         |
| Involvement as co-designer                     | 6155     | 16       |                           |           | 11.23    | .001     |                             |
| <b>No</b>                                      | 5837     | 12       | 0.192 [0.128; 0.257]      | <.00<br>1 | 14.32    | .22      | 23%                         |
| <b>Yes</b>                                     | 318      | 4        | 0.791 [0.447; 1.135]      | <.00<br>1 | 3.65     | .30      | 18%                         |

*n*=combined sample size; *k*=number of studies; Hedges' *g* (random effects); CI= confidence Interval; *Q*= homogeneity statistic (mixed effects); *I*<sup>2</sup>=Inconsistency, a second measure of heterogeneity; NA: not applicable

**Table A3-9.** Moderator analysis for the role of user involvement in designing **character looks** on the game effectiveness outcomes on behavior and behavioral determinants.

| Outcome                                        | <i>n</i> | <i>k</i> | Hedges' <i>g</i> (95% CI) | <i>P</i> | <i>Q</i> | <i>P</i>   | <i>I</i> <sup>2</sup> Index |
|------------------------------------------------|----------|----------|---------------------------|----------|----------|------------|-----------------------------|
| <b>BEHAVIOR</b>                                |          |          |                           |          |          |            |                             |
| Involvement as either informant or co-designer | 8016     | 14       |                           |          | 0.36     | .55        |                             |
| <b>No</b>                                      | 3382     | 4        | 0.050 [-0.050; 0.150]     | .33      | 1.84     | .61        | 0%                          |
| <b>Yes</b>                                     | 4634     | 10       | 0.089 [0.010; 0.167]      | .03      | 12.47    | .19        | 28%                         |
| Involvement as informant                       | 8016     | 14       |                           |          | 1.80     | .18        |                             |
| <b>No</b>                                      | 4012     | 6        | 0.030 [-0.055; 0.115]     | .49      | 3.15     | .68        | 0%                          |
| <b>Yes</b>                                     | 4004     | 8        | 0.113 [0.026; 0.199]      | .01      | 9.72     | .21        | 5%                          |
| Involvement as co-designer                     | 8016     | 14       |                           |          | 4.38     | <b>.04</b> |                             |
| <b>No</b>                                      | 6531     | 10       | 0.107 [0.047; 0.168]      | <.001    | 7.49     | .59        | 0%                          |
| <b>Yes</b>                                     | 1485     | 4        | -0.022 [-0.128; 0.083]    | .68      | 2.81     | .42        | 0%                          |
| <b>BEHAVIORAL DETERMINANTS</b>                 |          |          |                           |          |          |            |                             |
| Involvement as either informant or co-designer | 6155     | 16       |                           |          | 1.17     | .28        |                             |
| <b>No</b>                                      | 3251     | 8        | 0.197 [0.080; 0.314]      | .001     | 13.15    | .07        | 47%                         |
| <b>Yes</b>                                     | 2904     | 8        | 0.308 [0.145; 0.470]      | <.001    | 22.36    | .002       | 69%                         |
| Involvement as informant                       | 6155     | 16       |                           |          | 1.27     | .26        |                             |
| <b>No</b>                                      | 3571     | 9        | 0.200 [0.098; 0.302]      | <.001    | 13.59    | .09        | 41%                         |
| <b>Yes</b>                                     | 2584     | 7        | 0.326 [0.132; 0.519]      | .001     | 22.31    | .001       | 73%                         |
| Involvement as co-designer                     | 6155     | 16       |                           |          | 0.21     | .65        |                             |
| <b>No</b>                                      | 4178     | 12       | 0.272 [0.135; 0.408]      | <.001    | 35.79    | <.001      | 69%                         |
| <b>Yes</b>                                     | 1977     | 4        | 0.233 [0.138; 0.327]      | <.001    | 3.04     | .39        | 1%                          |

*n*=combined sample size; *k*=number of studies; Hedges' *g* (random effects); CI= confidence Interval; *Q*= homogeneity statistic (mixed effects); *I*<sup>2</sup>=Inconsistency, a second measure of heterogeneity; NA: not applicable

**Table A3-10.** Moderator analysis for the role of user involvement in designing **game world looks** on the game effectiveness outcomes on behavior and behavioral determinants.

| Outcome                                        | <i>n</i> | <i>k</i> | Hedges' <i>g</i> (95% CI) | <i>P</i> | <i>Q</i> | <i>P</i>    | <i>I</i> <sup>2</sup> Index |
|------------------------------------------------|----------|----------|---------------------------|----------|----------|-------------|-----------------------------|
| <b>BEHAVIOR</b>                                |          |          |                           |          |          |             |                             |
| Involvement as either informant or co-designer | 8016     | 14       |                           |          | 0.25     | .62         |                             |
| <b>No</b>                                      | 4668     | 9        | 0.093 [0.017; 0.168]      | .02      | 6.42     | .60         | 0%                          |
| <b>Yes</b>                                     | 3348     | 5        | 0.058[-0.055; 0.171]      | .31      | 7.89     | .096        | 49%                         |
| Involvement as informant                       | 8016     | 14       |                           |          | 0.25     | .62         |                             |
| <b>No</b>                                      | 4668     | 9        | 0.093 [0.017; 0.168]      | .02      | 6.42     | .60         | 0%                          |
| <b>Yes</b>                                     | 3348     | 5        | 0.058[-0.055; 0.171]      | 0.31     | 7.89     | .096        | 49%                         |
| Involvement as co-designer                     | 8016     | 14       |                           |          | 3.99     | <b>.046</b> |                             |
| <b>No</b>                                      | 7392     | 13       | 0.095 [0.039; 0.150]      | .001     | 10.69    | .56         | 0%                          |
| <b>Yes</b>                                     | 624      | 1        | -0.075 [-0.232; 0.082]    | .35      | NA       |             |                             |
| <b>BEHAVIORAL DETERMINANTS</b>                 |          |          |                           |          |          |             |                             |
| Involvement as either informant or co-designer | 6155     | 16       |                           |          | 0.32     | 0.57        |                             |
| <b>No</b>                                      | 4765     | 11       | 0.241 [0.118; 0.363]      | <.001    | 33.74    | <.001       | 70%                         |
| <b>Yes</b>                                     | 1390     | 5        | 0.288 [0.179; 0.397]      | <.001    | 2.88     | 0.58        | 0%                          |
| Involvement as informant                       | 6155     | 16       |                           |          | 0.05     | 0.83        |                             |
| <b>No</b>                                      | 4827     | 13       | 0.257 [0.135; 0.378]      | <.001    | 37.8     | <.001       | 68%                         |
| <b>Yes</b>                                     | 1328     | 3        | 0.275 [0.163; 0.386]      | <.001    | 0.144    | 0.93        | 0%                          |
| Involvement as co-designer                     | 6155     | 16       |                           |          | 0.59     | 0.44        |                             |
| <b>No</b>                                      | 5172     | 13       | 0.239 [0.129; 0.349]      | <.001    | 34.05    | <.01        | 65%                         |
| <b>Yes</b>                                     | 983      | 3        | 0.354 [0.082; 0.626]      | .01      | 2.63     | .27         | 24%                         |

*n*=combined sample size; *k*=number of studies; Hedges' *g* (random effects); CI= confidence Interval; *Q*= homogeneity statistic (mixed effects); *I*<sup>2</sup>=Inconsistency, a second measure of heterogeneity; NA: not applicable

**Table A3-11.** Moderator analysis for the role of user involvement in creating the **language in the game**, on the game effectiveness outcomes on behavior and behavioral determinants.

| Outcome                                        | <i>n</i> | <i>k</i> | Hedges' <i>g</i> (95% CI) | <i>P</i> | <i>Q</i> | <i>P</i> | <i>I</i> <sup>2</sup> Index |
|------------------------------------------------|----------|----------|---------------------------|----------|----------|----------|-----------------------------|
| <b>BEHAVIOR</b>                                |          |          |                           |          |          |          |                             |
| Involvement as either informant or co-designer | 8016     | 14       |                           |          | 0.79     | .37      |                             |
| <b>No</b>                                      | 4921     | 10       | 0.100 [0.028; 0.172]      | .007     | 8.11     | .52      | 0%                          |
| <b>Yes</b>                                     | 3095     | 4        | 0.038 [-0.077; 0.154]     | .52      | 5.66     | .13      | 47%                         |
| Involvement as informant                       | 8016     | 14       |                           |          | 0.79     | .37      |                             |
| <b>No</b>                                      | 4921     | 10       | 0.100 [0.028; 0.172]      | .007     | 8.11     | .52      | 0%                          |
| <b>Yes</b>                                     | 3095     | 4        | 0.038 [-0.077; 0.154]     | .52      | 5.66     | .13      | 47%                         |
| Involvement as co-designer                     | 8016     | 14       |                           |          | 0.10     | .75      |                             |
| <b>No</b>                                      | 6717     | 12       | 0.089 [0.032; 0.146]      | .002     | 9.95     | .54      | 0%                          |
| <b>Yes</b>                                     | 1299     | 2        | 0.045 [-0.217; 0.307]     | .74      | 3.49     | .06      | 71%                         |
| <b>BEHAVIORAL DETERMINANTS</b>                 |          |          |                           |          |          |          |                             |
| Involvement as either informant or co-designer | 6155     | 16       |                           |          | 0.01     | .93      |                             |
| <b>No</b>                                      | 4865     | 12       | 0.259 [0.141; 0.377]      | <.001    | 32.28    | .001     | 66%                         |
| <b>Yes</b>                                     | 1290     | 4        | 0.247 [0.020; 0.475]      | .03      | 6.40     | .094     | 53%                         |
| Involvement as informant                       | 6155     | 16       |                           |          | 0.46     | .50      |                             |
| <b>No</b>                                      | 4927     | 14       | 0.273 [0.156; 0.390]      | <.001    | 35.87    | .001     | 64%                         |
| <b>Yes</b>                                     | 1228     | 2        | 0.185 [-0.045; 0.414]     | .12      | 3.22     | .07      | 69%                         |
| Involvement as co-designer                     | 6155     | 16       |                           |          | 0.59     | .44      |                             |
| <b>No</b>                                      | 5172     | 13       | 0.239 [0.129; 0.349]      | <.001    | 34.05    | .001     | 65%                         |
| <b>Yes</b>                                     | 983      | 3        | 0.354 [0.082; 0.626]      | .01      | 2.63     | .27      | 24%                         |

*n*=combined sample size; *k*=number of studies; Hedges' *g* (random effects); CI= confidence Interval; *Q*= homogeneity statistic (mixed effects); *I*<sup>2</sup>=Inconsistency, a second measure of heterogeneity; NA: not applicable

**Table A3-12.** Moderator analysis for the role of user involvement in design of **rewards** on the game effectiveness outcomes on behavior and behavioral determinants.

| Outcome                                        | <i>n</i> | <i>k</i> | Hedges' <i>g</i> (95% CI) | <i>P</i> | <i>Q</i> | <i>P</i> | <i>I</i> <sup>2</sup> Index |
|------------------------------------------------|----------|----------|---------------------------|----------|----------|----------|-----------------------------|
| <b>BEHAVIOR</b>                                |          |          |                           |          |          |          |                             |
| Involvement as either informant or co-designer | 8016     | 14       |                           |          | 0.85     | .36      |                             |
| <b>No</b>                                      | 5606     | 10       | 0.056 [-0.023; 0.134]     | .17      | 11.07    | .27      | 19%                         |
| <b>Yes</b>                                     | 2410     | 4        | 0.109 [0.028; 0.190]      | .008     | 2.51     | .47      | 0%                          |
| Involvement as informant                       | 8016     | 14       |                           |          | 0.85     | .36      |                             |
| <b>No</b>                                      | 5606     | 10       | 0.056 [-0.023; 0.134]     | .17      | 11.07    | .27      | 19%                         |
| <b>Yes</b>                                     | 2410     | 4        | 0.109 [0.028; 0.190]      | .008     | 2.51     | .47      | 0%                          |
| Involvement as co-designer                     | 8016     | 14       |                           |          | NA       |          |                             |
| <b>No</b>                                      | 8016     | 14       | 0.075 [0.017; 0.133]      | .01      | 14.67    | .33      | 11%                         |
| <b>Yes</b>                                     | 0        | 0        |                           |          |          |          |                             |
| <b>BEHAVIORAL DETERMINANTS</b>                 |          |          |                           |          |          |          |                             |
| Involvement as either informant or co-designer | 6155     | 16       |                           |          | 2.07     | .15      |                             |
| <b>No</b>                                      | 5253     | 11       | 0.194 [0.120; 0.267]      | <.001    | 13.95    | .18      | 28%                         |
| <b>Yes</b>                                     | 902      | 5        | 0.464 [0.103; 0.824]      | .01      | 20.00    | <.001    | 80%                         |
| Involvement as informant                       | 6155     | 16       |                           |          | 0.20     | .66      |                             |
| <b>No</b>                                      | 5315     | 13       | 0.204 [0.126; 0.282]      | <.001    | 17.62    | .13      | 32%                         |
| <b>Yes</b>                                     | 840      | 3        | 0.428 [-0.023; 0.880]     | .06      | 17.75    | <.001    | 89%                         |
| Involvement as co-designer                     | 6155     | 16       |                           |          | NA       |          |                             |
| <b>No</b>                                      | 6093     | 14       | 0.241 [0.143; 0.340]      | <.001    | 35.75    | .001     | 64%                         |
| <b>Yes</b>                                     | 62       | 2        | 0.561 [-0.072; 1.194]     | .08      | 1.61     | .21      | 38%                         |

*n*=combined sample size; *k*=number of studies; Hedges' *g* (random effects); CI= confidence Interval; *Q*= homogeneity statistic (mixed effects); *I*<sup>2</sup>=Inconsistency, a second measure of heterogeneity; NA: not applicable



**Table A3-13.** Moderator analysis for the role of user involvement in design of **levels** on the game effectiveness outcomes on behavior and behavioral determinants.

| Outcome                                        | <i>n</i> | <i>k</i> | Hedges' <i>g</i> (95% CI) | <i>P</i> | <i>Q</i> | <i>P</i>    | <i>I</i> <sup>2</sup> Index |
|------------------------------------------------|----------|----------|---------------------------|----------|----------|-------------|-----------------------------|
| <b>BEHAVIOR</b>                                |          |          |                           |          |          |             |                             |
| Involvement as either informant or co-designer | 8016     | 14       |                           |          | NA       |             |                             |
| <b>No</b>                                      | 7882     | 13       | 0.070 [0.012; 0.128]      | .02      | 13.52    | .33         | 11%                         |
| <b>Yes</b>                                     | 134      | 1        | 0.274 [-0.092; 0.639]     | .14      | NA       |             |                             |
| Involvement as informant                       | 8016     | 14       |                           |          | NA       |             |                             |
| <b>No</b>                                      | 7882     | 13       | 0.070 [0.012; 0.128]      | .02      | 13.52    | .33         | 11%                         |
| <b>Yes</b>                                     | 134      | 1        | 0.274 [-0.092; 0.639]     | .14      | NA       |             |                             |
| Involvement as co-designer                     | 8016     | 14       |                           |          | NA       |             |                             |
| <b>No</b>                                      | 8016     | 14       | 0.075 [0.017; 0.133]      | .01      | 14.67    | .33         | 11%                         |
| <b>Yes</b>                                     | 0        | 0        |                           |          |          |             |                             |
| <b>BEHAVIORAL DETERMINANTS</b>                 |          |          |                           |          |          |             |                             |
| Involvement as either informant or co-designer | 6155     | 16       |                           |          | 7.02     | <b>.008</b> |                             |
| <b>No</b>                                      | 5294     | 13       | 0.191 [0.130; 0.253]      | <.001    | 14.40    | .28         | 17%                         |
| <b>Yes</b>                                     | 231      | 3        | 0.771 [0.347; 1.196]      | <.001    | 3.51     | .17         | 43%                         |
| Involvement as informant                       | 6155     | 16       |                           |          | 7.02     | <b>.008</b> |                             |
| <b>No</b>                                      | 5294     | 13       | 0.191 [0.130; 0.253]      | <.001    | 14.40    | .28         | 17%                         |
| <b>Yes</b>                                     | 231      | 3        | 0.771 [0.347; 1.196]      | <.001    | 3.51     | .17         | 43%                         |
| Involvement as co-designer                     | 6155     | 16       |                           |          | NA       |             |                             |
| <b>No</b>                                      | 6093     | 14       | 0.241 [0.143; 0.340]      | <.001    | 35.75    | .001        | 64%                         |
| <b>Yes</b>                                     | 62       | 2        | 0.561 [-0.072; 1.194]     | .08      | 1.61     | .21         | 38%                         |

*n*=combined sample size; *k*=number of studies; Hedges' *g* (random effects); CI= confidence Interval; *Q*= homogeneity statistic (mixed effects); *I*<sup>2</sup>=Inconsistency, a second measure of heterogeneity; NA: not applicable

**Table A3-14.** Moderator analysis for the role of user involvement in design of **controls** on the game effectiveness outcomes on behavior and behavioral determinants.

| Outcome                                        | <i>n</i> | <i>k</i> | Hedges' <i>g</i> (95% CI) | <i>P</i> | <i>Q</i> | <i>P</i> | <i>I</i> <sup>2</sup> Index |
|------------------------------------------------|----------|----------|---------------------------|----------|----------|----------|-----------------------------|
| <b>BEHAVIOR</b>                                |          |          |                           |          |          |          |                             |
| Involvement as either informant or co-designer | 8016     | 14       |                           |          | 0.37     | .54      |                             |
| <b>No</b>                                      | 7017     | 12       | 0.069 [0.003; 0.134]      | .04      | 13.62    | .26      | 19%                         |
| <b>Yes</b>                                     | 999      | 2        | 0.124 [-0.043; 0.290]     | .15      | 0.692    | .41      | 0%                          |
| Involvement as informant                       | 8016     | 14       |                           |          | 0.37     | .54      |                             |
| <b>No</b>                                      | 7017     | 12       | 0.069 [0.003; 0.134]      | .04      | 13.62    | .26      | 19%                         |
| <b>Yes</b>                                     | 999      | 2        | 0.124 [-0.043; 0.290]     | .15      | 0.692    | .41      | 0%                          |
| Involvement as co-designer                     | 8016     | 14       |                           |          | NA       |          |                             |
| <b>No</b>                                      | 7341     | 13       | 0.068 [0.008; 0.128]      | .03      | 13.64    | .32      | 12%                         |
| <b>Yes</b>                                     | 675      | 1        | 0.194 [-0.041; 0.429]     | .11      | NA       |          |                             |
| <b>BEHAVIORAL DETERMINANTS</b>                 |          |          |                           |          |          |          |                             |
| Involvement as either informant or co-designer | 6155     | 16       |                           |          | NA       |          |                             |
| <b>No</b>                                      | 6068     | 15       | 0.253 [0.153; 0.353]      | <.001    | 39.12    | <.001    | 64%                         |
| <b>Yes</b>                                     | 87       | 1        | 0.463 [-1.473; 2.399]     | .64      | NA       |          |                             |
| Involvement as informant                       | 6155     | 16       |                           |          | NA       |          |                             |
| <b>No</b>                                      | 6068     | 15       | 0.253 [0.153; 0.353]      | <.001    | 39.12    | <.001    | 64%                         |
| <b>Yes</b>                                     | 87       | 1        | 0.463 [-1.473; 2.399]     | .64      | NA       |          |                             |
| Involvement as co-designer                     | 6155     | 16       |                           |          | NA       |          |                             |
| <b>No</b>                                      | 6155     | 16       | 0.253 [0.154; 0.351]      | <.001    | 39.19    | .001     | 62%                         |
| <b>Yes</b>                                     | 0        | 0        |                           |          | NA       |          |                             |

*n*=combined sample size; *k*=number of studies; Hedges' *g* (random effects); CI= confidence Interval; *Q*= homogeneity statistic (mixed effects); *I*<sup>2</sup>=Inconsistency, a second measure of heterogeneity; NA: not applicable

**Table A3-15.** Moderator analysis for the role of user involvement in design of **action and interactivity** on the game effectiveness outcomes on behavior and behavioral determinants.

| Outcome                                        | <i>n</i> | <i>k</i> | Hedges' <i>g</i> (95% CI) | <i>P</i> | <i>Q</i> | <i>P</i> | <i>I</i> <sup>2</sup> Index |
|------------------------------------------------|----------|----------|---------------------------|----------|----------|----------|-----------------------------|
| <b>BEHAVIOR</b>                                |          |          |                           |          |          |          |                             |
| Involvement as either informant or co-designer | 8016     | 14       |                           |          | 0.11     | .74      |                             |
| <b>No</b>                                      | 5634     | 9        | 0.087 [0.023; 0.152]      | .008     | 6.03     | .64      | 0%                          |
| <b>Yes</b>                                     | 2382     | 5        | 0.063 [-0.069; 0.194]     | .35      | 8.29     | .08      | 52%                         |
| Involvement as informant                       | 8016     | 14       |                           |          | 0.54     | .47      |                             |
| <b>No</b>                                      | 6309     | 10       | 0.095 [0.032; 0.157]      | .003     | 6.76     | .66      | 0%                          |
| <b>Yes</b>                                     | 1707     | 4        | 0.035 [-0.112; 0.182]     | .64      | 6.70     | .08      | 55%                         |
| Involvement as co-designer                     | 8016     | 14       |                           |          | NA       |          |                             |
| <b>No</b>                                      | 7341     | 13       | 0.068 [0.008; 0.128]      | .03      | 13.64    | .32      | 12%                         |
| <b>Yes</b>                                     | 675      | 1        | 0.194 [-0.041; 0.429]     | .11      | NA       |          |                             |
| <b>BEHAVIORAL DETERMINANTS</b>                 |          |          |                           |          |          |          |                             |
| Involvement as either informant or co-designer | 6155     | 16       |                           |          | 0.48     | .49      |                             |
| <b>No</b>                                      | 4388     | 12       | 0.283 [0.150; 0.461]      | <.001    | 35.70    | <.001    | 69%                         |
| <b>Yes</b>                                     | 1767     | 4        | 0.223 [0.119; 0.328]      | <.001    | 3.29     | .35      | 9%                          |
| Involvement as informant                       | 6155     | 16       |                           |          | 0.48     | 0.49     |                             |
| <b>No</b>                                      | 4388     | 12       | 0.283 [0.150; 0.461]      | <.001    | 35.70    | <.001    | 69%                         |
| <b>Yes</b>                                     | 1767     | 4        | 0.223 [0.119; 0.328]      | <.001    | 3.29     | 0.35     | 9%                          |
| Involvement as co-designer                     | 6155     | 16       |                           |          | NA       |          |                             |
| <b>No</b>                                      | 6155     | 16       | 0.253 [0.154; 0.351]      | <.001    | 39.19    | .001     | 62%                         |
| <b>Yes</b>                                     | 0        | 0        |                           |          | NA       |          |                             |

*n*=combined sample size; *k*=number of studies; Hedges' *g* (random effects); CI= confidence Interval; *Q*= homogeneity statistic (mixed effects); *I*<sup>2</sup>=Inconsistency, a second measure of heterogeneity; NA: not applicable
